# Supplementary material
Source: Research Square preprint supplement (doi:10.21203/rs.3.rs-8844583/v1)
Supplement: Supplementary file 1 [file 14e8babca3add4553f16a3a4.docx]

**Supplementary Information**

**Title:** Can human-made structures enhance the genetic diversity and population dynamics of midwife toads (*Alytes dickhilleni*)?

**Authors:** Jesús Manuel Aragón 1, Carles Vilà 2, Eva M. Albert 3

1 Department of Physical, Chemical and Natural Systems, Universidad Pablo de Olavide, Seville, Spain.

2 Conservation and Evolutionary Genetics Group, Estación Biológica de Doñana (EBD-CSIC),

Seville, Spain

3 Department of Evolutionary Biology and Environmental Studies, University of Zurich,

Zurich, Switzerland

**Corresponding Author:** Eva M. Albert, [eva.albert@ieu.uzh.ch](mailto:eva.albert@ieu.uzh.ch)

**Table S1.** Characteristics of the 29 populations. Includes: population code, status (natural/artificial), subpopulation, full name, geographic coordinates (lat, lon), UTM coordinates (X, Y), number of genotyped individuals (N), genetic diversity parameters (expected heterozygosity Hexp., observed heterozygosity Hobs., private alleles PA, allelic richness AR, inbreeding coefficient FIS), environmental variables (NDVI, altitude), and pond characteristics (distance to nearest pond, size in m²)."

| **Population** | status | subpopulation | name_population |  |  |  |  | N | Hexp. | H.n.b. | Hobs. | PA | AR | FIS |
| --- | --- | --- | --- | --- | --- | --- | --- | --- | --- | --- | --- | --- | --- | --- |
| **1** | artificial | 1 | Campamento Cañada Fuentes |  |  |  |  | 11 | 0.61 | 0.639 | 0.664 | 1 | 5.25 | 0.01 |
| **2** | artificial | 1 | Casa control Chozuelas |  |  |  |  | 16 | 0.584 | 0.607 | 0.599 | 2(2) | 4.417 | 0.008 |
| **3** | artificial | 1 | Casa control Rasos |  |  |  |  | 22 | 0.669 | 0.684 | 0.655 | 5(5) | 5.917 | 0.008 |
| **4** | natural | 1 | Arroyo Guadahornillos |  |  |  |  | 37 | 0.644 | 0.653 | 0.667 | 2(2) | 7.833 | 0.012 |
| **5** | artificial | 1 | Piscina Roblehondo |  |  |  |  | 15 | 0.598 | 0.619 | 0.644 | 0 | 4.917 | 0.01 |
| **6** | natural | 1 | Arroyo de la Gracea Este |  |  |  |  | 16 | 0.662 | 0.683 | 0.672 | 2(2) | 7 | 0.009 |
| **7** | natural | 1 | Arroyo del rio Barosa |  |  |  |  | 9 | 0.692 | 0.733 | 0.722 | 3(2) | 5.333 | 0.009 |
| **8** | natural | 1 | Canada Pajarera |  |  |  |  | 16 | 0.628 | 0.648 | 0.664 | 0 | 4.75 | 0.009 |
| **9** | artificial | 1 | Bebederos de Rambla seca |  |  |  |  | 12 | 0.66 | 0.688 | 0.632 | 0 | 5.667 | 0.007 |
| **10** | artificial | 1 | Cortijo de Pinar Negro |  |  |  |  | 11 | 0.628 | 0.658 | 0.705 | 0 | 5.25 | 0.011 |
| **11** | artificial | 1 | Cueva Paria |  |  |  |  | 30 | 0.667 | 0.678 | 0.653 | 0 | 5.75 | 0.007 |
| **12** | artificial | 1 | Refugio Cañada rincón |  |  |  |  | 31 | 0.674 | 0.685 | 0.682 | 2(2) | 7 | 0.009 |
| **13** | artificial | 1 | Pozo nuevo |  |  |  |  | 20 | 0.691 | 0.708 | 0.695 | 2(2) | 6.417 | 0.009 |
| **14** | artificial | 1 | Canada rincon |  |  |  |  | 12 | 0.622 | 0.649 | 0.648 | 0 | 5.25 | 0.009 |
| **15** | artificial | 1 | Pozo Purga |  |  |  |  | 24 | 0.649 | 0.662 | 0.667 | 1 | 7 | 0.01 |
| **16** | artificial | 1 | Pozo la Losilla |  |  |  |  | 34 | 0.691 | 0.702 | 0.667 | 1 | 8.083 | 0.006 |
| **17** | artificial | 1 | Bebederos Espinos |  |  |  |  | 20 | 0.654 | 0.671 | 0.654 | 1 | 6.333 | 0.008 |
| **18** | artificial | 1 | Abrevadero Don Fernando |  |  |  |  | 16 | 0.685 | 0.707 | 0.677 | 1 | 5.583 | 0.008 |
| **19** | artificial | 1 | Pozo Prado Gonzalo |  |  |  |  | 20 | 0.643 | 0.659 | 0.667 | 2(2) | 6.333 | 0.01 |
| **20** | natural | 2 | Fuente del Borbotón |  |  |  |  | 20 | 0.668 | 0.685 | 0.679 | 1 | 6.417 | 0.01 |
| **21** | artificial | 2 | Fuente de la Chaparra |  |  |  |  | 16 | 0.585 | 0.604 | 0.672 | 0 | 3.917 | 0.013 |
| **22** | natural | 2 | Loma de los muertos |  |  |  |  | 13 | 0.65 | 0.676 | 0.718 | 0 | 4.5 | 0.011 |
| **23** | artificial | 2 | Tiná de las cruces |  |  |  |  | 16 | 0.636 | 0.656 | 0.682 | 2(1) | 5.083 | 0.011 |
| **24** | natural | 2 | Arroyo de la Juan fria |  |  |  |  | 20 | 0.652 | 0.669 | 0.658 | 1 | 6.083 | 0.009 |
| **25** | artificial | 2 | Pozo de los Navarros |  |  |  |  | 16 | 0.642 | 0.663 | 0.588 | 0 | 5.5 | 0.006 |
| **26** | artificial | 2 | Fuente de la Zarza |  |  |  |  | 19 | 0.593 | 0.609 | 0.623 | 0 | 4.417 | 0.011 |
| **27** | artificial | 2 | Fuentesaltas |  |  |  |  | 15 | 0.653 | 0.675 | 0.671 | 3(3) | 5.75 | 0.009 |
| **28** | natural | 2 | Fuente del Engarbo |  |  |  |  | 16 | 0.617 | 0.636 | 0.646 | 1 | 5.333 | 0.01 |
| **29** | artificial | 2 | Hoya de la Viga |  |  |  |  | 16 | 0.682 | 0.704 | 0.771 | 2(2) | 6 | 0.013 |

| **Population** | NDVI_mean | altitude_mean | NDVI_mean_1000 | altitude_min | altitude_max | near_pond | size_pond.m2. |
| --- | --- | --- | --- | --- | --- | --- | --- |
| **1** | 0.18711875 | 1416.33533 | 0.18059823 | 1355 | 1538 | 2.96509731 | 33.7 |
| **2** | 0.05325267 | 1454.5875 | 0.17108839 | 1377 | 1579 | 6.71198338 | 2 |
| **3** | 0.22045118 | 1193.30539 | 0.18647049 | 1177 | 1226 | 2.96509731 | 0.073 |
| **4** | 0.19466317 | 1252.70482 | 0.22434946 | 1178 | 1353 | 1.06029143 | 0.24 |
| **5** | 0.21628205 | 1273.27607 | 0.2162228 | 1180 | 1339 | 1.06029143 | 7.6 |
| **6** | 0.23060474 | 788.567901 | 0.24738967 | 731 | 894 | 1.07352372 | 898 |
| **7** | 0.20612645 | 798.573171 | 0.24456841 | 722 | 922 | 1.07352372 | 12.4 |
| **8** | 0.14737816 | 1630.65432 | 0.16332719 | 1616 | 1672 | 4.27651573 | 1.3 |
| **9** | 0.21132059 | 1587.5509 | 0.17031503 | 1580 | 1596 | 4.20217998 | 29 |
| **10** | 0.20076418 | 1684.71687 | 0.17532921 | 1663 | 1734 | 2.81791621 | 210 |
| **11** | 0.16980289 | 1666.97576 | 0.14446461 | 1650 | 1696 | 2.04495009 | 84 |
| **12** | 0.16724045 | 1716.05325 | 0.14810603 | 1705 | 1743 | 0.35676318 | 4.6 |
| **13** | 0.1400312 | 1744.70122 | 0.14783016 | 1715 | 1809 | 0.35676318 | 8 |
| **14** | 0.19350657 | 1721.42945 | 0.14720511 | 1713 | 1747 | 0.51578279 | 4.7 |
| **15** | 0.15243315 | 1659.20988 | 0.15037576 | 1645 | 1672 | 2.04495009 | 8.3 |
| **16** | 0.14796707 | 1716.51829 | 0.14470914 | 1708 | 1727 | 0.51578279 | 155 |
| **17** | 0.12797512 | 1757.78313 | 0.15287031 | 1731 | 1806 | 1.87531384 | 26.4 |
| **18** | 0.14333735 | 1686.37126 | 0.14485405 | 1663 | 1730 | 1.9718234 | 0.34 |
| **19** | 0.13907835 | 1735.27108 | 0.1607971 | 1726 | 1748 | 1.9718234 | 4.6 |
| **20** | 0.14132238 | 1606.21472 | 0.17479857 | 1576 | 1662 | 1.16167304 | 6.7 |
| **21** | 0.16650209 | 1782.95092 | 0.16705941 | 1708 | 1844 | 1.16167304 | 6.2 |
| **22** | 0.19101707 | 1658.24096 | 0.17865006 | 1639 | 1670 | 0.0745416 | 6.7 |
| **23** | 0.18912823 | 1661.99401 | 0.17598822 | 1643 | 1672 | 0.0745416 | 9.8 |
| **24** | 0.12440703 | 1643.76786 | 0.14308296 | 1608 | 1715 | 3.64481973 | 0.24 |
| **25** | 0.17537005 | 1671.63473 | 0.16994579 | 1628 | 1748 | 2.18556568 | 127.5 |
| **26** | 0.20466013 | 1568.31515 | 0.17800989 | 1543 | 1590 | 2.18556568 | 4.6 |
| **27** | 0.20383608 | 1571.90798 | 0.19244775 | 1560 | 1606 | 8.98152793 | 63 |
| **28** | 0.12815148 | 1655.90244 | 0.14042975 | 1625 | 1683 | 5.2159872 | 35.4 |
| **29** | 0.13310629 | 1649.74699 | 0.13396782 | 1607 | 1703 | 10.217367 | 98.9 |

**Table S2.** Population pair matrix showing genetic differentiation values (FST) in the upper triangle and geographical distances in kilometers in the lower triangle. The main diagonal is represented by dashes.

| **Pop** | 1 | 2 | 3 | 4 | 5 | 6 | 7 | 8 | 9 | 10 | 11 | 12 | 13 | 14 |
| --- | --- | --- | --- | --- | --- | --- | --- | --- | --- | --- | --- | --- | --- | --- |
| **1** | - | 0.08077 | 0.05579 | 0.0161 | 0.04726 | 0.01957 | 0.02727 | 0.1061 | 0.01797 | 0.11372 | 0.07597 | 0.05984 | 0.06865 | 0.06686 |
| **2** | 6.712 | - | 0.06766 | 0.08943 | 0.09817 | 0.04115 | 0.07742 | 0.10918 | 0.09467 | 0.12545 | 0.08285 | 0.08786 | 0.09105 | 0.08308 |
| **3** | 2.9651 | 9.5616 | - | 0.05134 | 0.07856 | 0.02864 | 0.05304 | 0.06177 | 0.05783 | 0.08844 | 0.07219 | 0.05729 | 0.06105 | 0.05807 |
| **4** | 16.2135 | 21.6708 | 13.5286 | - | 0.03939 | 0.02299 | 0.031 | 0.09033 | 0.02249 | 0.08084 | 0.0532 | 0.0454 | 0.05052 | 0.04052 |
| **5** | 16.0193 | 21.2553 | 13.4309 | 1.0603 | - | 0.02603 | 0.03668 | 0.10587 | 0.06634 | 0.07449 | 0.06173 | 0.06171 | 0.07043 | 0.0636 |
| **6** | 21.9706 | 27.4283 | 19.2357 | 5.7814 | 6.2001 | - | 0.00745 | 0.05644 | 0.03828 | 0.06813 | 0.034 | 0.03415 | 0.04254 | 0.02425 |
| **7** | 22.9861 | 28.3764 | 20.2689 | 6.7769 | 7.1226 | 1.0735 | - | 0.08287 | 0.05532 | 0.06963 | 0.04548 | 0.03824 | 0.04836 | 0.05033 |
| **8** | 19.9511 | 23.4057 | 18.0911 | 8.6254 | 7.6771 | 9.8308 | 9.9899 | - | 0.09394 | 0.09236 | 0.09757 | 0.08911 | 0.0916 | 0.10924 |
| **9** | 24.1656 | 27.6709 | 22.2027 | 11.22 | 10.495 | 10.0877 | 9.7853 | 4.2765 | - | 0.1074 | 0.0528 | 0.05502 | 0.04363 | 0.04223 |
| **10** | 30.3482 | 34.7489 | 27.9527 | 14.8332 | 14.6499 | 10.2789 | 9.3018 | 11.8611 | 8.204 | - | 0.05305 | 0.05648 | 0.09117 | 0.10171 |
| **11** | 28.1258 | 31.8336 | 26.027 | 14.028 | 13.5152 | 11.16 | 10.4813 | 8.4301 | 4.2022 | 4.7947 | - | 0.01461 | 0.01916 | 0.01955 |
| **12** | 30.6611 | 34.5996 | 28.4453 | 15.8772 | 15.5123 | 12.0748 | 11.2085 | 11.2494 | 7.1093 | 2.8606 | 2.9641 | - | 0.01927 | 0.00339 |
| **13** | 30.9978 | 34.9512 | 28.7736 | 16.1645 | 15.8124 | 12.2838 | 11.4018 | 11.6048 | 7.4659 | 2.8179 | 3.3156 | 0.3568 | - | 0.00664 |
| **14** | 31.6006 | 35.543 | 29.3763 | 16.7476 | 16.4038 | 12.7962 | 11.8978 | 12.1858 | 8.0261 | 3.0551 | 3.849 | 0.945 | 0.6031 | - |
| **15** | 30.0493 | 33.5982 | 27.9974 | 16.071 | 15.5598 | 13.0307 | 12.2907 | 10.2156 | 5.9391 | 5.119 | 2.045 | 2.3913 | 2.6187 | 2.8969 |
| **16** | 31.5239 | 35.3843 | 29.3329 | 16.8203 | 16.4457 | 13.013 | 12.137 | 11.9982 | 7.7955 | 3.4866 | 3.5947 | 0.9518 | 0.7421 | 0.5158 |
| **17** | 33.2811 | 37.3329 | 31.0022 | 18.1571 | 17.8834 | 13.8317 | 12.8677 | 14.0151 | 9.887 | 3.5751 | 5.7224 | 2.7779 | 2.4212 | 1.8753 |
| **18** | 33.8577 | 37.2945 | 31.8198 | 19.7706 | 19.3057 | 16.286 | 15.4398 | 13.9736 | 9.7082 | 6.7438 | 5.8291 | 4.2434 | 4.0941 | 3.7056 |
| **19** | 33.4512 | 36.5743 | 31.5451 | 20.0158 | 19.4581 | 17.033 | 16.2654 | 13.5007 | 9.3476 | 8.1545 | 6.022 | 5.3863 | 5.3508 | 5.1279 |
| **20** | 37.6113 | 41.2648 | 35.4627 | 22.9275 | 22.5826 | 18.7709 | 17.8122 | 17.8739 | 13.5992 | 8.519 | 9.496 | 7.0729 | 6.7703 | 6.1814 |
| **21** | 38.3629 | 42.1332 | 36.1648 | 23.4635 | 23.1633 | 19.1062 | 18.12 | 18.7281 | 14.4644 | 8.8284 | 10.309 | 7.7197 | 7.3945 | 6.793 |
| **22** | 41.9745 | 45.9523 | 39.681 | 26.6743 | 26.4735 | 21.8938 | 20.8557 | 22.5623 | 18.3314 | 11.8411 | 14.1366 | 11.3656 | 11.0182 | 10.4207 |
| **23** | 41.9754 | 45.9441 | 39.6854 | 26.6872 | 26.4834 | 21.9164 | 20.8792 | 22.5522 | 18.319 | 11.8542 | 14.1254 | 11.3606 | 11.0137 | 10.4156 |
| **24** | 38.121 | 41.2416 | 36.1818 | 24.3445 | 23.8586 | 20.8268 | 19.9538 | 18.1705 | 13.9809 | 10.9494 | 10.3467 | 8.752 | 8.5521 | 8.072 |
| **25** | 40.834 | 44.5375 | 38.6497 | 25.95 | 25.6552 | 21.5272 | 20.5282 | 21.1418 | 16.8689 | 11.2635 | 12.7453 | 10.2073 | 9.8846 | 9.2837 |
| **26** | 41.3199 | 44.7366 | 39.2447 | 26.8688 | 26.4972 | 22.7525 | 21.7896 | 21.447 | 17.1817 | 12.4905 | 13.2178 | 10.9924 | 10.7053 | 10.1272 |
| **27** | 50.9553 | 54.8885 | 48.6497 | 35.5545 | 35.3943 | 30.5733 | 29.5143 | 31.484 | 27.2288 | 20.7444 | 23.055 | 20.3353 | 19.9904 | 19.3907 |
| **28** | 45.4842 | 48.4532 | 43.566 | 31.6231 | 31.1764 | 27.7811 | 26.8452 | 25.5345 | 21.3636 | 17.5796 | 17.6924 | 15.8182 | 15.5655 | 15.0188 |
| **29** | 61.1482 | 64.9684 | 58.8608 | 45.7644 | 45.6109 | 40.7237 | 39.6593 | 41.5702 | 37.2991 | 30.9612 | 33.1582 | 30.4994 | 30.1586 | 29.5568 |

| **Pop** | 15 | 16 | 17 | 18 | 19 | 20 | 21 | 22 | 23 | 24 | 25 | 26 | 27 | 28 | 29 |
| --- | --- | --- | --- | --- | --- | --- | --- | --- | --- | --- | --- | --- | --- | --- | --- |
| **1** | 0.0815 | 0.08915 | 0.07053 | 0.08926 | 0.10771 | 0.10503 | 0.17216 | 0.14687 | 0.12299 | 0.1077 | 0.18635 | 0.11805 | 0.13416 | 0.17643 | 0.12663 |
| **2** | 0.09381 | 0.07551 | 0.08829 | 0.09863 | 0.10908 | 0.12646 | 0.18512 | 0.15857 | 0.12817 | 0.10905 | 0.14868 | 0.11863 | 0.17689 | 0.15646 | 0.14403 |
| **3** | 0.06728 | 0.06224 | 0.04704 | 0.08252 | 0.08377 | 0.09626 | 0.1651 | 0.11805 | 0.10745 | 0.09346 | 0.12213 | 0.104 | 0.1317 | 0.11816 | 0.08464 |
| **4** | 0.05785 | 0.07124 | 0.05654 | 0.07945 | 0.07471 | 0.0884 | 0.14809 | 0.12076 | 0.0988 | 0.08562 | 0.15776 | 0.09213 | 0.13461 | 0.14701 | 0.11235 |
| **5** | 0.06891 | 0.08653 | 0.07912 | 0.07734 | 0.07298 | 0.1037 | 0.17507 | 0.13698 | 0.10877 | 0.10125 | 0.13876 | 0.12057 | 0.12923 | 0.16619 | 0.11775 |
| **6** | 0.04467 | 0.02942 | 0.03506 | 0.05772 | 0.0534 | 0.05494 | 0.11908 | 0.09132 | 0.06074 | 0.05655 | 0.09753 | 0.07875 | 0.09978 | 0.10653 | 0.08396 |
| **7** | 0.04526 | 0.04346 | 0.04754 | 0.06707 | 0.07386 | 0.07039 | 0.12173 | 0.11093 | 0.08872 | 0.07362 | 0.1111 | 0.09597 | 0.08575 | 0.13026 | 0.08394 |
| **8** | 0.10241 | 0.08323 | 0.09069 | 0.11996 | 0.12206 | 0.1268 | 0.20388 | 0.15805 | 0.13648 | 0.12547 | 0.15355 | 0.15252 | 0.18004 | 0.17678 | 0.13004 |
| **9** | 0.06062 | 0.06813 | 0.06958 | 0.05092 | 0.06798 | 0.09028 | 0.16104 | 0.09359 | 0.08368 | 0.06962 | 0.1493 | 0.11087 | 0.14349 | 0.13299 | 0.11389 |
| **10** | 0.08785 | 0.0756 | 0.04642 | 0.08365 | 0.08793 | 0.10676 | 0.15924 | 0.13894 | 0.12134 | 0.11317 | 0.12976 | 0.15534 | 0.14145 | 0.16035 | 0.12494 |
| **11** | 0.04601 | 0.02526 | 0.04644 | 0.02777 | 0.02193 | 0.04189 | 0.0873 | 0.07046 | 0.06427 | 0.01859 | 0.08073 | 0.08157 | 0.09244 | 0.08324 | 0.09665 |
| **12** | 0.04011 | 0.03012 | 0.02117 | 0.03165 | 0.03008 | 0.04472 | 0.10547 | 0.07103 | 0.06468 | 0.02877 | 0.09106 | 0.08884 | 0.07364 | 0.09564 | 0.07737 |
| **13** | 0.02895 | 0.03085 | 0.04843 | 0.02919 | 0.02691 | 0.0376 | 0.09996 | 0.06825 | 0.06711 | 0.01599 | 0.09534 | 0.07399 | 0.09338 | 0.09807 | 0.08073 |
| **14** | 0.03232 | 0.02194 | 0.0305 | 0.02736 | 0.0199 | 0.04321 | 0.11068 | 0.07052 | 0.06105 | 0.02124 | 0.08878 | 0.0779 | 0.09569 | 0.08953 | 0.08186 |
| **15** | - | 0.03898 | 0.05395 | 0.06321 | 0.05159 | 0.07332 | 0.13138 | 0.08681 | 0.07019 | 0.04866 | 0.10711 | 0.07496 | 0.10375 | 0.11996 | 0.08768 |
| **16** | 2.442 | - | 0.0396 | 0.03548 | 0.02673 | 0.02933 | 0.0633 | 0.06113 | 0.05926 | 0.01794 | 0.06001 | 0.06609 | 0.08778 | 0.07786 | 0.07831 |
| **17** | 4.6344 | 2.2188 | - | 0.07119 | 0.04168 | 0.06743 | 0.12061 | 0.09115 | 0.06398 | 0.06131 | 0.09854 | 0.10119 | 0.10562 | 0.10752 | 0.08461 |
| **18** | 3.823 | 3.3532 | 3.9194 | - | 0.02208 | 0.03886 | 0.10002 | 0.06005 | 0.06716 | 0.02168 | 0.06982 | 0.0884 | 0.077 | 0.07799 | 0.07715 |
| **19** | 4.0241 | 4.6693 | 5.7641 | 1.9718 | - | 0.02421 | 0.08314 | 0.03726 | 0.03395 | 0.00169 | 0.04944 | 0.07051 | 0.0724 | 0.04861 | 0.07527 |
| **20** | 7.6667 | 6.1513 | 4.9454 | 4.1263 | 5.5911 | - | 0.03773 | 0.04594 | 0.05195 | 0.01005 | 0.05987 | 0.07733 | 0.05557 | 0.0527 | 0.07995 |
| **21** | 8.5666 | 6.8394 | 5.3216 | 5.187 | 6.7339 | 1.1617 | - | 0.10556 | 0.11561 | 0.05904 | 0.11347 | 0.12067 | 0.12146 | 0.12103 | 0.1385 |
| **22** | 12.5102 | 10.5683 | 8.6936 | 9.2361 | 10.7332 | 5.1517 | 4.0492 | - | 0.02941 | 0.03656 | 0.05071 | 0.09405 | 0.08458 | 0.06374 | 0.06801 |
| **23** | 12.4922 | 10.5598 | 8.6943 | 9.2053 | 10.6939 | 5.1153 | 4.0183 | 0.0745 | - | 0.03555 | 0.06527 | 0.07963 | 0.07538 | 0.06778 | 0.07153 |
| **24** | 8.3053 | 7.8171 | 7.5504 | 4.5898 | 4.6835 | 3.6448 | 4.5418 | 7.6122 | 7.5517 | - | 0.05221 | 0.05372 | 0.06246 | 0.04017 | 0.07211 |
| **25** | 10.9406 | 9.318 | 7.7974 | 7.359 | 8.6176 | 3.2757 | 2.4931 | 2.5085 | 2.4438 | 5.1271 | - | 0.10815 | 0.08416 | 0.05297 | 0.08526 |
| **26** | 11.2706 | 10.053 | 8.9223 | 7.4738 | 8.2698 | 3.9837 | 3.8068 | 4.4548 | 4.382 | 3.951 | 2.1856 | - | 0.13655 | 0.11286 | 0.11311 |
| **27** | 21.3351 | 19.5171 | 17.675 | 17.8007 | 18.9592 | 13.704 | 12.7698 | 8.9815 | 8.982 | 14.783 | 10.4422 | 10.8383 | - | 0.0748 | 0.04108 |
| **28** | 15.6615 | 14.8663 | 14.0059 | 11.8731 | 12.034 | 9.0789 | 9.0217 | 8.5362 | 8.4655 | 7.3863 | 7.0926 | 5.216 | 10.2652 | - | 0.0748 |
| **29** | 31.3708 | 29.6595 | 27.87 | 27.7182 | 28.6706 | 23.7042 | 22.8494 | 19.1809 | 19.1777 | 24.1951 | 20.4309 | 20.4011 | 10.2174 | 17.9908 | - |
|  |  |  |  |  |  |  |  |  |  |  |  |  |  |  |  |

**Table S3.** Contemporary migration rate matrix (m) estimated using BAYESASS v3.0.5, representing the proportion of recent migrants (last 2-3 generations) between each pair of populations. The values indicate the probability that an individual in the destination population (row) is a recent immigrant from the source population (column). The migration rates detected were generally low (<1%), although notable flows exceeding 10% were observed in some population pairs. The table only shows pairs of populations with migration rates above 1%.

| Pop-target | Pop-source (migration rate) |
| --- | --- |
| 4 | 1 (0.101), 2 (0.074), 3 (0.103), 5 (0.103), 6 (0.088), 7 (0.046), 9 (0.083), 10 (0.042) |
| 11 | 2 (0.017), 3 (0.015), 4 (0.010), 5 (0.013), 6 (0.018), 9 (0.017), 10 (0.020), 12 (0.091), 13 (0.095), 14 (0.042), 15 (0.074), 16 (0.072), 17 (0.041), 18 (0.067), 19 (0.101), 20 (0.084), 21 (0.084), 22 (0.058), 23 (0.092), 24 (0.105), 25 (0.073), 26 (0.072), 28 (0.089) |
| 12 | 2 (0.015), 5 (0.011), 6 (0.023), 7 (0.034), 8 (0.066), 9 (0.017), 10 (0.032), 11 (0.018), 13 (0.025), 14 (0.062), 15 (0.030), 16 (0.066), 17 (0.062), 18 (0.042) |
| 16 | 3 (0.010), 6 (0.013), 10 (0.023), 20 (0.019), 21 (0.024), 25 (0.020) |
| 26 | 18 (0.015), 22 (0.011), 28 (0.012) |
| 29 | 18 (0.014), 22 (0.013), 25 (0.017), 27 (0.092), 28 (0.017) |
| 21 | 20 (0.014) |
| 23 | 22 (0.013) |
| 25 | 22 (0.013) |


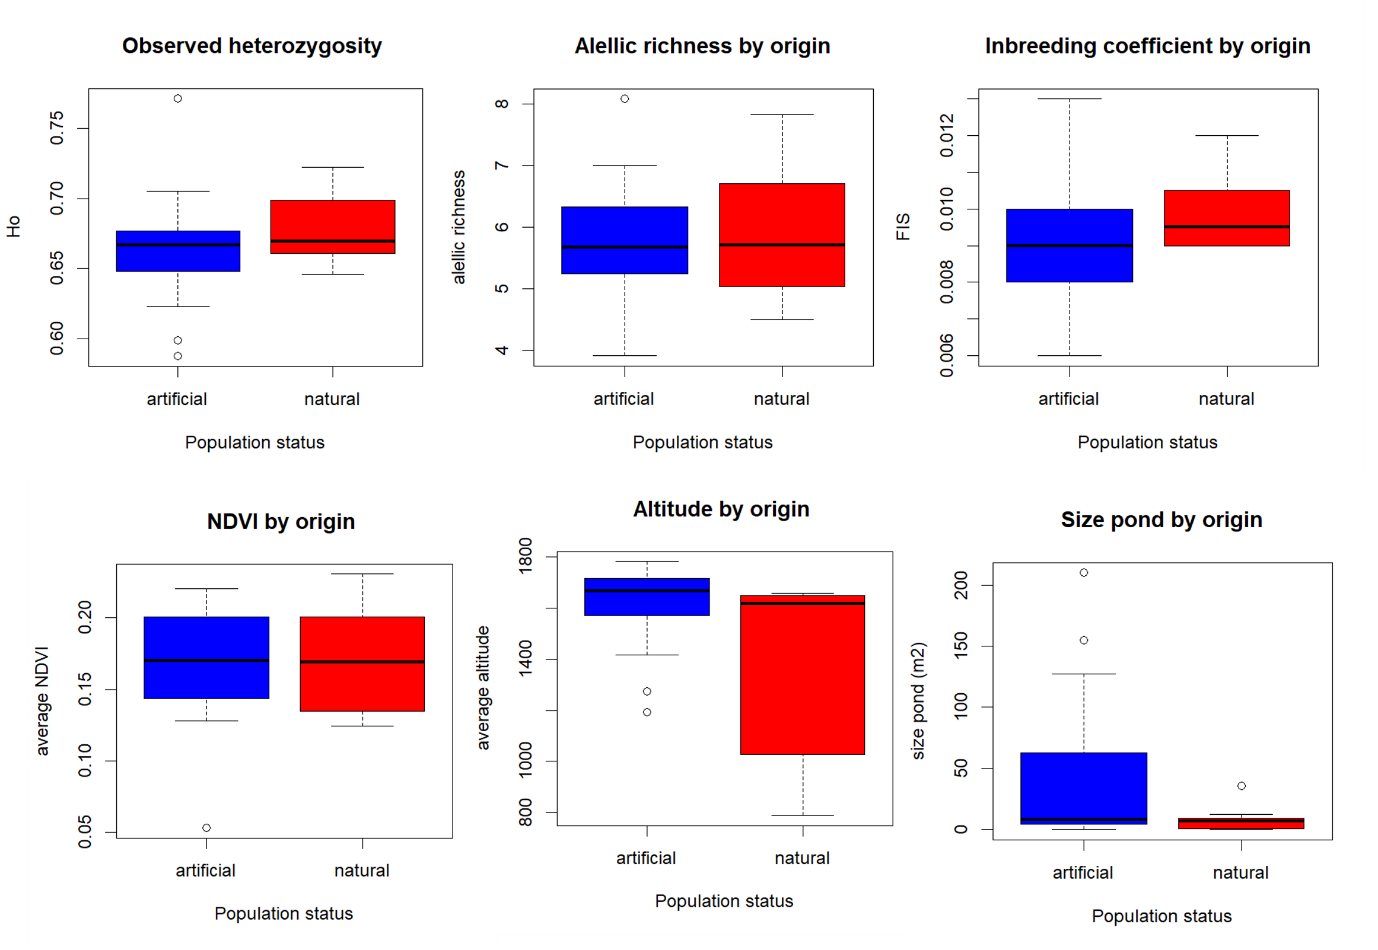


**Fig S1.** Comparison of multiple genetic and environmental parameters between natural and artificial ponds. The boxplots show (from left to right, top row): observed heterozygosity (Ho), allelic richness (AR), inbreeding coefficient (FIS); (bottom row): NDVI vegetation index, average altitude, and pond size. No statistically significant differences were detected between natural and artificial ponds (p > 0.05).

**
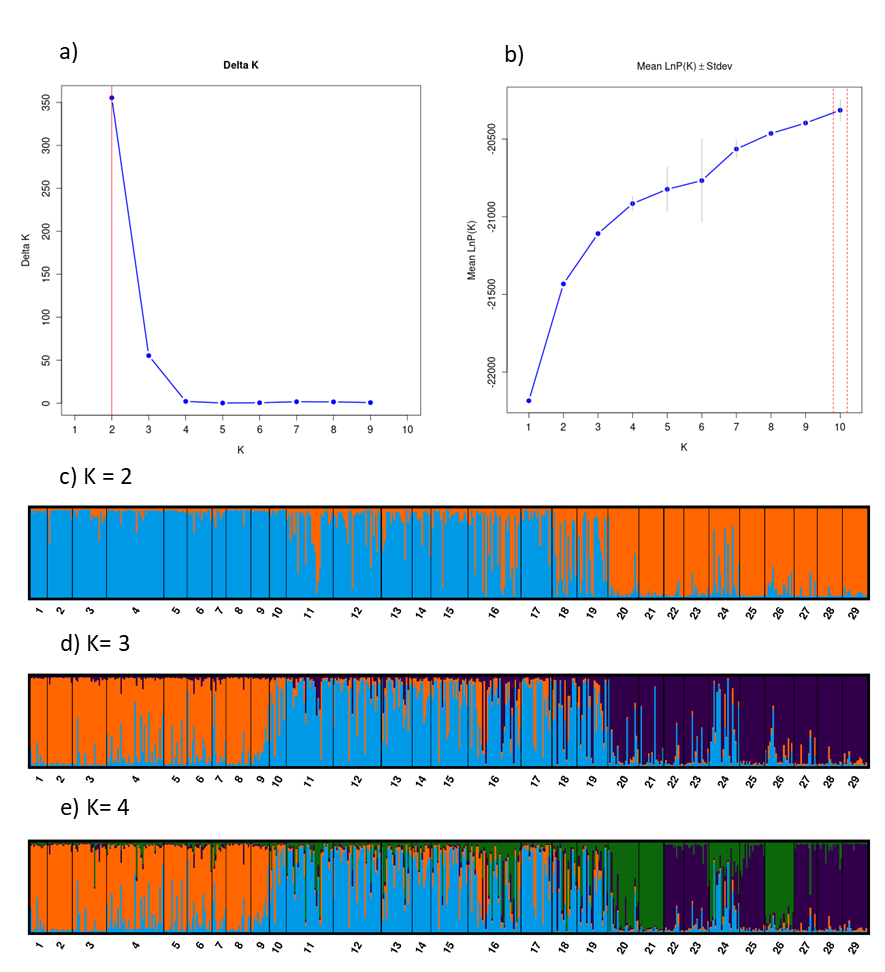
**

**Fig S2.** These Bayesian structure analyses performed using STRUCTURE for *Alytes dickhilleni*. (a) Delta K plot according to Evanno et al. (2005), indicating that the optimal value of K is 2. (b) Mean values ​​of Ln P(K) ± standard deviation for K = 1 to 10. Although the values ​​increase progressively, the greatest difference in the rate of change is observed between K = 1 and K = 2.
